# Supplementary material for: Geomorphometric maps of Australia’s Marine Park estate and their role in improving the integrated monitoring and management of marine ecosystems
Source: Frontiers journal article supplement (doi:10.3389/fmars.2023.1302108), 2024-01-11
Supplement: Table_1.DOCX [file Table_1.DOCX]

**Supplementary information #1**

Input bathymetry data sources used in generating bathymetry mosaics and processing for extraction of geomorphometry features.

| **Data type** | **Title** | **Survey ID** | **Australian Marine Park** | **Gridded resolution intersecting AMPs** | **Bathymetry type** | **Collecting organisation** | **Access URL** |
| --- | --- | --- | --- | --- | --- | --- | --- |
| survey | Alkimos | AK2009TRBS_Lidar | Two Rocks | 10m | Lidar | WA Department of Transport | https://dot-wa.maps.arcgis.com/home/item.html?id=3b3ddc34aabd4c1c8765fbe876afd71f |
| survey | Antarctic Bathymetry 5m - 210m (CSIRO) in2019_v01 | IN2019_V01 | Huon, South Tasman Rise | 32m | Multibeam | CSIRO/AAD | https://marlin.csiro.au/geonetwork/srv/eng/catalog.search#/metadata/d2881b44-45a9-464c-a496-e6b3ebc691ca |
| survey | Apollo Bay Bathymetry 2020 0.5m |  | Apollo | 0.5m | Multibeam | Deakin University | https://pid.geoscience.gov.au/dataset/ga/140109 |
| survey | Apollo Marine Park Bathymetry 2020 2m |  | Apollo | 2m | Multibeam | Deakin University | https://pid.geoscience.gov.au/dataset/ga/147191 |
| survey | Australian Eastern Continental Margin Bathymetry 10m - 210m (CSIRO) in2017_v03 | IN2017_V03 | Coral Sea, East Gippsland, Flinders, Freycinet, Central Eastern, Hunter, Jervis | 10-128m | Multibeam | CSIRO | https://marlin.csiro.au/geonetwork/srv/eng/catalog.search#/metadata/fdbdbcb5-7fa2-443d-9b37-607d76fa2bac |
| survey | Austrea Bathymetry 1999 100m | AUSTREA1 | Central Eastern, East Gippsland, Flinders, Freycinet, Huon, Jervis, Murray, Tasman Fracture, Western Eyre, Zeehan | 100m | Multibeam | AGSO | https://pid.geoscience.gov.au/dataset/ga/144240 |
| survey | Balleny Mantle Plume (IN2018_V08) - 128m | IN2018_V08 | Freycinet, South Tasman Rise | 64-128m | Multibeam | UTAS | https://marlin.csiro.au/geonetwork/srv/eng/catalog.search#/metadata/7d014f19-9866-473f-8b53-57052efc9897 |
| survey | Bass Strait (SI002; IN2018_C01) | IN2018_C01 | Beagle, Freycinet | 2m | Multibeam | Australian Hydrographic Office (AHO) | https://marlin.csiro.au/geonetwork/srv/eng/catalog.search#/metadata/77a27a72-8a11-4d9a-8009-dce524925591 |
| survey | Bass Strait Maritime Heritage Survey Bathymetry 2m - 50m (CSIRO) in2019_v07 | IN2019_V07 | Beagle, Freycinet | 2-50m | Multibeam | ANMM | https://marlin.csiro.au/geonetwork/srv/eng/catalog.search#/metadata/ead93e08-7786-4886-a28d-aa340548afe1 |
| survey | Beagle Marine Park Bathymetry 2018 1m |  | Beagle | 1m | Multibeam | GA/UTAS/IMAS | https://pid.geoscience.gov.au/dataset/ga/130301 |
| survey | Boags Commonwealth Marine Reserve Bathymetry 1m (CSIRO) bf2018_v01 | BF2018_V01 | Boags | 1m | Multibeam | IMAS/UTAS | https://portal.ga.gov.au/metadata/elevation-and-depth/bathymetry-survey/boags-commonwealth-marine-reserve-bathymetry-1m-csiro-bf2018v01/d11960b1-e67d-44e9-9d1c-291fb22ca418 |
| compilation | Bremer Denmark Sub Basins Bathymetry 2019 20m | various | Bremer, South-west Corner | 20m |  | GA | https://pid.geoscience.gov.au/dataset/ga/132281 |
| survey | Bremer Leeuwin and Perth Canyons Bathymetry 2020 2m - 64m | FK200126/GA4865 | Bremer, Perth Canyon, South-west Corner | 2-64m | Multibeam | GA | https://pid.geoscience.gov.au/dataset/ga/145543 |
| survey | Brisbane to Hobart Transit Bathymetry 10m - 210m (CSIRO) in2018_t02 | in2018_t02 | Central Eastern, East Gippsland, Flinders, Freycinet, Hunter, Jervis | 10m | Multibeam | CSIRO | https://marlin.csiro.au/geonetwork/srv/eng/catalog.search#/metadata/e79d1a1e-c4f4-4838-a15e-a9ecc0fdf959 |
| survey | Bunbury | BU2009TRBS_Lidar | Geographe | 10m | Lidar | WA Department of Transport | https://dot-wa.maps.arcgis.com/home/item.html?id=3b3ddc34aabd4c1c8765fbe876afd71f |
| survey | Busselton | BS2009TRBS_Lidar | Geographe | 10m | Lidar | WA Department of Transport | https://dot-wa.maps.arcgis.com/home/item.html?id=3b3ddc34aabd4c1c8765fbe876afd71f |
| survey | Cape Darnley East Antarctica Bathymetry 10m - 210m (CSIRO) in2023_v01 | IN2023_V01 | Central Eastern, Eastern Recherche, South-west Corner, Tasman Fracture | 16-210m | Multibeam | CSIRO | https://marlin.csiro.au/geonetwork/srv/eng/catalog.search#/metadata/0f253f27-26b1-4dca-8945-a7f5ad6edb62 |
| survey | Cape Range Canyon Bathymetry 2020 16m - 64m | FK200308 | Abrolhos, Gascoyne, Ningaloo | 16-64m | Multibeam | Western Australian Museum | https://pid.geoscience.gov.au/dataset/ga/140111 |
| survey | Carnarvon Shelf Bathymetry 2008 3m | SOL4769_2008 | Gascoyne | 3m | Multibeam | GA/CERF | https://pid.geoscience.gov.au/dataset/ga/72005 |
| compilation | Cato, West and Birds Island (Coral Sea QLD) | various | Coral Sea | 50m |  | GA | https://pid.geoscience.gov.au/dataset/ga/76752 |
| DEM | Christmas Island DEM 2010 50m | various | Christmas Island | 50m |  | GA | https://pid.geoscience.gov.au/dataset/ga/70652 |
| survey | Coral Sea Canyons and Reefs Bathymetry 2020 16m - 64m | FK200802 | Coral Sea | 16-64m | Multibeam | GA | https://pid.geoscience.gov.au/dataset/ga/144385 |
| survey | Coral Sea to Arafura Sea Transit Bathymetry 10m - 30m (CSIRO) in2019_t02 | IN2019_T02 | Coral Sea | 10-30m | Multibeam | JCU | https://portal.ga.gov.au/metadata/elevation-and-depth/bathymetry-survey/coral-sea-to-arafura-sea-transit-bathymetry-10m-30m-csiro-in2019t02/62fbb2f6-d66f-4956-9d83-ae5173e201d7 |
| compilation | DOT-022 | various | Geographe, Two Rocks | 5m | LIDAR, Laser, Multibeam | WA Department of Transport | https://catalogue.data.wa.gov.au/dataset/composite-surfaces-multibeam-lidar-laser |
| survey | East Australian Current Bathymetry 10m - 210m (CSIRO) in2015_v02 | IN2015_V02 | Central Eastern, East Gippsland, Hunter, Huon, Solitary Islands, South Tasman Rise, Tasman Fracture | 16-128m | Multibeam | CSIRO | https://marlin.csiro.au/geonetwork/srv/eng/catalog.search#/metadata/1ebcf3a3-d660-402a-e053-08114f8c6578 |
| survey | East Australian Current IMOS Bathymetry 10m - 210m (CSIRO) in2019_v05 | IN2019_V05 | Central Eastern, East Gippsland, Hunter, Jervis | 20-128m | Multibeam | CSIRO | https://marlin.csiro.au/geonetwork/srv/eng/catalog.search#/metadata/e05398fb-b678-4a04-8065-20a0f8f8619f |
| survey | Elizabeth Middleton Reef Bathymetry 2020 5m | GA4848 | Hunter | 5m | Multibeam | GA, IMAS-UTAS, ACFR-USyd, DPI NSW, Parks Australia | https://pid.geoscience.gov.au/dataset/ga/144415 |
| survey | Faust Capel Basin Bathymetry 2007 20m - 100m | GA-2436/TAN0713 | Gifford | 20-40m | Multibeam | GA | https://pid.geoscience.gov.au/dataset/ga/75582 |
| survey | Fiji to Hobart Transit Bathymetry 10m - 210m (CSIRO) in2016_t01 | IN2016_T01 | Coral Sea, East Gippsland, Central Eastern, Flinders, Freycinet | 10-128m | Multibeam | CSIRO | https://marlin.csiro.au/geonetwork/srv/eng/catalog.search#/metadata/6aff9a82-ead5-41a8-bfdb-1e39f7433c35 |
| survey | Flinders Bay | AU201405_Multi | South-west Corner | 2m | Multibeam | WA Department of Transport | https://dot-wa.maps.arcgis.com/home/item.html?id=3b3ddc34aabd4c1c8765fbe876afd71f |
| survey | Flinders Commonwealth Marine Reserve Bathymetry 2012 2m | GA-0337 | Flinders, Freycinet | 2m | Multibeam | GA | https://pid.geoscience.gov.au/dataset/ga/147053 |
| survey | Flinders surveys - NESP compiled - 4m | various | Flinders | 3-5m |  | various |  |
| survey | Fremantle Hobart (SOJN05MV) Bathymetry 1997 128m | SOJN05MV | Perth Canyon, South-west Corner, Tasman Fracture | 128m | Multibeam | SIO | https://pid.geoscience.gov.au/dataset/ga/144318 |
| survey | Fremantle-Hobart transit (IN2017_T02) - 128m | IN2017_T02 | Bremer, Eastern Recherche, Huon, Perth Canyon, South-west Corner, Zeehan | 8-128m | Multibeam | Macquarie University | https://marlin.csiro.au/geonetwork/srv/eng/catalog.search#/metadata/27d4e32f-1ec5-405f-a3dc-12c4a22cc79f |
| survey | Freycinet Marine Park Bathymetry 10m - 210m (CSIRO) in2015_e05 | IN2015_E05 | Freycinet | 10-128m | Multibeam | CSIRO | https://marlin.csiro.au/geonetwork/srv/eng/catalog.search#/metadata/1ebac941-c79b-565e-e053-08114f8c50a2 |
| compilation | Geographe Marine Park Bathymetry 2018 5m | various | Geographe | 5m |  | GA | https://pid.geoscience.gov.au/dataset/ga/121158 |
| compilation | Gifford Marine Park Bathymetry 2018 30m | various | Gifford | 30m |  | GA | https://pid.geoscience.gov.au/dataset/ga/121193 |
| survey | Great Australian Bight 10m - 210m (CSIRO) IN2015_C01 | IN2015_C01 | Bremer, Eastern Recherche, Huon, Murray, South-west Corner, Zeehan | 10-128m | Multibeam | CSIRO | https://marlin.csiro.au/geonetwork/srv/eng/catalog.search#/metadata/1d871e55-d484-43ae-bf5b-8a2d9db8ea09 |
| survey | Great Australian Bight Bathymetry 5m - 100m (CSIRO) in2017_c01 | IN2017_C01 | Huon, Murray, Nelson, Western Eyre, Western Kangaroo Island, Zeehan | 20-100m | Multibeam | CSIRO | https://marlin.csiro.au/geonetwork/srv/eng/catalog.search#/metadata/b5143cfc-0678-4b16-a246-fbcfa4e2d921 |
| DEM | Great Barrier Reef Bathymetry 2020 100m | various | Coral Sea, Gifford, Central Eastern, West Cape York | 100m |  | various | http://pid.geoscience.gov.au/dataset/ga/133163 |
| DEM | Great Barrier Reef Bathymetry 2020 30m | various | Coral Sea | 30m |  | various | https://pid.geoscience.gov.au/dataset/ga/115066 |
| survey | Heard and Macdonald Islands Bathymetry 10m - 210m (CSIRO) in2016_v01 | IN2016_V01 | Heard Island and McDonald Islands, Eastern Recherche, South-west Corner | 64-128m | Multibeam | CSIRO | https://marlin.csiro.au/geonetwork/srv/eng/catalog.search#/metadata/cf05cd4b-95cf-4747-88cb-5c8e21f39865 |
| survey | Hobart to Brisbane Transit Bathymetry 10m - 210m (CSIRO) in2018_t01 | IN2018_T01 | Flinders, Freycinet, Central Eastern, Jervis | 32-128m | Multibeam | CSIRO | https://marlin.csiro.au/geonetwork/srv/eng/catalog.search#/metadata/4290967c-1c80-4fee-a7ba-67eeb441e411 |
| survey | Hobart to Sydney Transit Bathymetry 10m - 210m (CSIRO) in2015_t01 | IN2015_T01 | Flinders, Freycinet, Jervis | 32-128m | Multibeam | CSIRO | https://marlin.csiro.au/geonetwork/srv/eng/catalog.search#/metadata/1eba78c0-8897-3e3a-e053-08114f8c3dd8 |
| survey | Hogan Island (Bass Strait) | HI-598 | Beagle | 2m | Multibeam | Australian Hydrographic Office (AHO) |  |
| survey | Horrocks-Hillarys | SE2016_Lidar | Two Rocks | 5m | Lidar | WA Department of Transport | https://dot-wa.maps.arcgis.com/home/item.html?id=3b3ddc34aabd4c1c8765fbe876afd71f |
| survey | Houtman Sub-basin Bathymetry 2014 15m - 25m |  | Abrolhos, Gascoyne, Ningaloo | 10-25m | Multibeam | GA | https://pid.geoscience.gov.au/dataset/ga/89855 |
| survey | Hunter Marine Park 2020 5m | NSW DPIE | Hunter | 5m | Multibeam | NESP | https://portal.ga.gov.au/metadata/elevation-and-depth/bathymetry-survey/hunter-marine-park-2020-5m/1c7a7096-07a8-4f9d-9c85-d94ffa2e858c |
| compilation | Huon and Tasman Fracture compiled surveys [C.B. masters] | various | Huon, Tasman Fracture | 30m |  | various |  |
| survey | Huon IN2020_V10 - 15m | IN2020_V10 | Huon | 5-50m | Multibeam | UTAS |  |
| survey | Huon Marine Park Bathymetry 5m-210m (CSIRO) in2015_e02 | IN2015_E02 | Huon | 5-128m | Multibeam | CSIRO | https://marlin.csiro.au/geonetwork/srv/eng/catalog.search#/metadata/1ebca768-7caf-034a-e053-08114f8c90b8 |
| survey | Indian Ocean Bathymetry 10m - 210m (CSIRO) in2019_v03 | IN2019_V03 | Abrolhos, Gascoyne, Ningaloo, South-west Corner | 10-210m | Multibeam | CSIRO | https://marlin.csiro.au/geonetwork/srv/eng/catalog.search#/metadata/c2d99945-ab15-4400-a101-d672839e934d |
| survey | Indian Ocean Transit Bathymetry 10m - 50m (CSIRO) in2019_t03 | IN2019_T03 | Abrolhos, Gascoyne, Ningaloo | 10-50m | Multibeam | CSIRO | https://marlin.csiro.au/geonetwork/srv/eng/catalog.search#/metadata/f015afa4-8b96-497d-bd01-a5d7b2a7c7bd |
| survey | Kenn and Chesterfield Plateaux Bathymetry 2021 64m | FK210206 | Coral Sea | 64m | Multibeam | UQ | https://pid.geoscience.gov.au/dataset/ga/145381 |
| DEM | Kerguelen Plateau Bathymetry 2022 100m |  | Heard Island and McDonald Islands | 100m |  | GA | https://pid.geoscience.gov.au/dataset/ga/147703 |
| survey | Kermadec Volcanic Arc Bathymetry 10m - 210m (CSIRO) in2022_v02 | IN2022_V02 | Freycinet | 10-128m | Multibeam | CSIRO | https://marlin.csiro.au/geonetwork/srv/eng/catalog.search#/metadata/607756fd-ed54-49fa-9d26-e4680afe8a68 |
| survey | King Island North Bass Strait VIC (HIPP SI1013) Bathymetry 2021 30m | SI 1013 | Apollo | 30m | Multibeam | Australian Hydrographic Office (AHO) | https://pid.geoscience.gov.au/dataset/ga/147098 |
| survey | Lord Howe Island Bathymetry 2008 10m - 50m | SS06/2008 | Central Eastern | 10-50m | Multibeam | CSIRO/GA | https://pid.geoscience.gov.au/dataset/ga/144097 |
| DEM | Lord Howe Island high resolution bathymetry grids | various | Central Eastern | 8-250m | DEM | GA | https://pid.geoscience.gov.au/dataset/ga/70649 |
| survey | Lord Howe Rise Bathymetry 2016 50 - 80m | KR1605 | Central Eastern, Coral Sea | 50-80m | Multibeam | GA/JAMSTEC | https://pid.geoscience.gov.au/dataset/112283 |
| survey | Lord Howe Rise Bathymetry 2017 70m - 90m | KR1715 Legs1-3 | Central Eastern, Coral Sea, Gifford | 90m | Multibeam | GA/JAMSTEC | https://pid.geoscience.gov.au/dataset/ga/123889 |
| survey | Macquarie Island Bathymetry 2m - 200m (CSIRO) in2020_v06 | IN2020_V06 | Macquarie Island | 2-200m | Multibeam | UTAS | https://marlin.csiro.au/geonetwork/srv/eng/catalog.search#/metadata/bec2d562-c76d-4fe0-a8d2-cad4544659ad |
| survey | Macquarie Island Ridge Complex 5m - 210m (CSIRO) TAN2021_V01 | TAN2021_V01 | Macquarie Island | 5-128m | Multibeam | CSIRO | https://marlin.csiro.au/geonetwork/srv/eng/catalog.search#/metadata/e17ce8f6-2a14-4145-85bf-187de79d2445 |
| survey | Macquarie Ridge Bathymetry 1994 128m | RS9401 | Macquarie Island | 128m | Multibeam | AGSO | https://pid.geoscience.gov.au/dataset/ga/144418 |
| survey | Mawson Station Bathymetry 10 - 100m (CSIRO) in2021_v01 | IN2021_V01 | Huon, Tasman Fracture | 10-100m | Multibeam | CSIRO | https://marlin.csiro.au/geonetwork/srv/eng/catalog.search#/metadata/5123b79d-76e0-489f-b9ab-845f0bfceaba |
| survey | Mentelle Basin Bathymetry 2005 50m | SS08/2005 | Perth Canyon | 50m | Multibeam | GA | https://pid.geoscience.gov.au/dataset/ga/75235 |
| survey | Microbes (IN2016_V04) | IN2016_V04 | Central Eastern, Hunter, Jervis | 50m | Multibeam | CSIRO O&A | https://marlin.csiro.au/geonetwork/srv/eng/catalog.search#/metadata/c051f12b-db30-4ee3-a1bd-92bd6ae76d81 |
| compilation | Multibeam Bathymetry of Australia 2018 50m | various | various | 50m |  | GA | https://pid.geoscience.gov.au/dataset/ga/124063 |
| survey | Norfolk Island Nearshore and Coastal Habitat Mapping AU420 Bathymetry 2021 1m | 20210019S | Norfolk | 1m | Multibeam | Deakin University | https://pid.geoscience.gov.au/dataset/ga/148607 |
| survey | North Perth Basin Bathymetry 2011 15m - 32m | SS2011_v05 | Abrolhos, Two Rocks | 32m | Multibeam | GA | https://pid.geoscience.gov.au/dataset/ga/73437 |
| survey | Northeast Tasmania Bathymetry 2011 2m | GA-0331 | Flinders, Freycinet | 2m | Multibeam | GA | https://pid.geoscience.gov.au/dataset/ga/147036 |
| survey | Northern Great Barrier Reef 2020 64m | FK200930 | Coral Sea | 64m | Multibeam | JCU/QUT | https://pid.geoscience.gov.au/dataset/ga/144545 |
| survey | NSW Continental Shelf Bathymetry 2006 50m | SS10/2006 | Hunter, Jervis | 50m | Multibeam | GA | https://pid.geoscience.gov.au/dataset/ga/75122 |
| survey | NSW Costal Reforms Marine LiDAR | various | Cod Grounds, Solitary Islands | 5m | LADS | NSWDPIE | https://datasets.seed.nsw.gov.au/dataset/marine-lidar-topo-bathy-2018 |
| survey | NSW OEH Multibeam Bathymetry Surveys | various | Cod Grounds, Hunter, Solitary Islands | 5m | Multibeam | NSWDPIE | https://catalogue-imos.aodn.org.au/geonetwork/srv/eng/catalog.search#/metadata/60160b01-8ffc-45ce-a6f4-ee70ce391ec6 |
| survey | NSW OEH Singlebeam Bathymetry and Coastal Topography Surveys | various | Cod Grounds | 50m | Singlebeam LiDAR and GNSS survey | NSWDPIE | https://catalogue-imos.aodn.org.au/geonetwork/srv/eng/catalog.search#/metadata/8b2ddb75-2f29-4552-af6c-eac9b02156a6 |
| survey | NW Bio (SS05/2007) | SS05/2007 | Argo-Rowley Terrace, Mermaid Reef, Ningaloo | 30m | Multibeam | CSIRO CMAR | https://marlin.csiro.au/geonetwork/srv/eng/catalog.search#/metadata/bc1b3741-e72f-5039-e044-00144f7bc0f4 |
| survey | Ocean Variability 170W (IN2016_V03) - 128m | IN2016_V03 | Huon, Macquarie Island, South Tasman Rise | 128m | Multibeam | CSIRO O&A | https://marlin.csiro.au/geonetwork/srv/eng/catalog.search#/metadata/8305e5ca-0eca-4137-80c9-83def80f4675 |
| compilation | Otway Basin Bathymetry 2020 50m | various | Franklin, Zeehan, Apollo, Nelson, Murray | 50m |  | GA | https://pid.geoscience.gov.au/dataset/ga/144351 |
| survey | Perth Canyon (EM300 Trials) Bathymetry 2003 10m - 40m |  | Perth Canyon | 10-40m | Multibeam | CSIRO | https://pid.geoscience.gov.au/dataset/ga/75906 |
| compilation | Perth Canyon Marine Park Bathymetry 2018 40m | various | Perth Canyon, Two Rocks | 40m |  | GA | https://pid.geoscience.gov.au/dataset/ga/121172 |
| survey | Quinns Rocks | UR2009TRBS_Lidar | Two Rocks | 10m | Lidar | WA Department of Transport | https://dot-wa.maps.arcgis.com/home/item.html?id=3b3ddc34aabd4c1c8765fbe876afd71f |
| survey | Raine Island Bathymetry 2021 2m - 64m | FK210321/GA4873 | Coral Sea, West Cape York | 2-16m | Multibeam | GA | https://pid.geoscience.gov.au/dataset/ga/145492 |
| survey | Sabrina Coast Bathymetry 10m - 200m (CSIRO) in2017_v01 | IN2017_V01 | Huon, Tasman Fracture | 150m | Multibeam | Macquarie University | https://marlin.csiro.au/geonetwork/srv/eng/catalog.search#/metadata/780470b6-120c-4e51-aed2-da6ab6de3f5e |
| survey | SOTS 2018 (IN2018_V07) - 128m | IN2018_V07 | Huon, Tasman Fracture | 4-64m | Multibeam | BOM | https://marlin.csiro.au/geonetwork/srv/eng/catalog.search#/metadata/8207c8f4-a697-4f09-8894-12f3dce288f9 |
| survey | South Pacific Ocean Bathymetry 10m - 200m (CSIRO) in2020_v09 | IN2020_V09 | Tasman Fracture, Huon, South Tasman Rise | 200m |  | CSIRO | https://portal.ga.gov.au/metadata/elevation-and-depth/bathymetry-survey/south-pacific-ocean-bathymetry-10m-200m-csiro-in2020v09/0b6fee81-4547-4c13-ba45-ac8a6e21c0bc |
| survey | South Tasman Rise Bathymetry 1994 100m | GA-0125 | Huon, Nelson, South Tasman Rise, Tasman Fracture, Zeehan | 100m | Multibeam | GA/IFREMER | https://pid.geoscience.gov.au/dataset/ga/144237 |
| survey | South-East Tasmania 5m - 210m (CSIRO) in2021_e03 | IN2021_E03 | Huon | 5-128m | Multibeam | CSIRO | https://marlin.csiro.au/geonetwork/srv/eng/catalog.search#/metadata/e2331ae0-c31a-4415-8bc3-365d12a14d33 |
| survey | South-East Tasmania 5m - 210m (CSIRO) in2021_e04 | IN2021_E04 | Freycinet | 10-210m | Multibeam | CSIRO | https://marlin.csiro.au/geonetwork/srv/eng/catalog.search#/metadata/51890ff6-19a6-4a7f-931e-bf781d292f9c |
| survey | Southeast Tasmania and Southern Macquarie Ridge (AUSTREA2) Bathymetry 2000 120-440m | AUSTREA2 | Freycinet, Huon, Macquarie Island, South Tasman Rise | 120m | Multibeam | GA/NOO | https://pid.geoscience.gov.au/dataset/ga/147364 |
| survey | Southeast Tasmania Bathymetry 2009 1m - 1.6m | GA-0315 | Freycinet, Huon | 1m | Multibeam | TAFI | https://pid.geoscience.gov.au/dataset/ga/72003 |
| survey | South-Eastern Tasmania Bathymetry 10m - 210 (CSIRO) in2015_e06 | IN2015_E06 | Freycinet | 10-128m | Multibeam | CSIRO | https://marlin.csiro.au/geonetwork/srv/eng/catalog.search#/metadata/2c67d4ef-f3d8-1f1f-e053-08114f8cd4d5 |
| survey | Southern Great Barrier Reef Shelf 2020 64m | FK201122 | Coral Sea | 64m | Multibeam | QUT | https://pid.geoscience.gov.au/dataset/ga/145133 |
| compilation | Southern Indian Ocean (MH370) Bathymetry 2017 150m | GP1483 | Abrolhos, Carnarvon Canyon, Christmas Island, Gascoyne, Perth Canyon, South-west Corner, Two Rocks | 150m | Multibeam | ATSB | https://pid.geoscience.gov.au/dataset/ga/100315 |
| survey | Southern Ocean Bathymetry 10m - 210m (CSIRO) in2015_e01 | IN2015_E01 | Tasman Fracture | 10-128m | Multibeam | CSIRO | https://marlin.csiro.au/geonetwork/srv/eng/catalog.search#/metadata/146f3a49-fa02-1c63-e053-08114f8c246d |
| survey | Southern Ocean Bathymetry 5m - 200m (CSIRO) in2020_v08 | IN2020_V08 | Huon, Tasman Fracture | 5-200m | Multibeam | UTAS | https://marlin.csiro.au/geonetwork/srv/eng/catalog.search#/metadata/21cb2d1b-b216-4adf-8674-f0277fbd7c64 |
| survey | Southern Ocean Bathymetry 5m - 210m (CSIRO) in2022_v03 | IN2022_V03 | Huon | 5-128m | Multibeam | CSIRO | https://marlin.csiro.au/geonetwork/srv/eng/catalog.search#/metadata/d1123261-8733-4d19-a5ad-58e05f045858 |
| survey | Southern Ocean IMOS bathymetry 10m - 210m (CSIRO) in2015_v01 | IN2015_V01 | Huon, Tasman Fracture | 10-128m | Multibeam | CSIRO | https://marlin.csiro.au/geonetwork/srv/eng/catalog.search#/metadata/14bea058-3ed5-409d-e053-08114f8c9d97 |
| survey | Southern Ocean Transit Bathymetry 100m (CSIRO) in2019_t01 | IN2019_T01 | Eastern Recherche, Huon, Murray, Nelson, Perth Canyon, South-west Corner, Tasman Fracture, Western Eyre, Zeehan | 100m | Multibeam | Macquarie University | https://marlin.csiro.au/geonetwork/srv/eng/catalog.search#/metadata/f08ec7af-bd5b-4125-b892-3ef385c0306c |
| survey | Southwest Corner Marine Park Bathymetry 2021 5m | GA4858 | South-west Corner | 5m | Multibeam | GA/UWA | https://pid.geoscience.gov.au/dataset/ga/145281 |
| survey | Sydney Albany Transit Bathymetry 2020 16m - 64m | GA4864 | Western Eyre, Murray, Nelson, Jervis | 16-64m |  | GA | https://pid.geoscience.gov.au/dataset/ga/145544 |
| survey | Sydney to Hobart Bathymetry 10m - 210m (CSIRO) in2016_e02 | IN2016_E02 | East Gippsland, Freycinet, Flinders | 10-128m | Multibeam | CSIRO | https://marlin.csiro.au/geonetwork/srv/eng/catalog.search#/metadata/171f956e-196b-46c3-b92c-fef3e9990eb7 |
| survey | Sydney to Hobart Transit Bathymetry 10m - 210m (CSIRO) in2015_t02 | IN2015_T01 | East Gippsland, Freycinet, Flinders, Jervis | 10-210m | Multibeam | CSIRO | https://marlin.csiro.au/geonetwork/srv/eng/catalog.search#/metadata/13f7bf87-7b49-4c65-902d-7073af6c1453 |
| survey | Tasman and Coral Seas Bathymetry 2021 64m | FK201228 | Coral Sea | 64m | Multibeam | JCU/UQ | https://pid.geoscience.gov.au/dataset/ga/145279 |
| survey | Tasman Australian Marine Parks Bathymetry 0.5m - 2m (CSIRO) bf2019_v01 | BF2019_V01 | Freycinet, Huon, Tasman Fracture | 0.5-2m | Multibeam | IMAS/UTAS | https://marlin.csiro.au/geonetwork/srv/eng/catalog.search#/metadata/17a94733-becb-493e-849c-945dfcc80e1e |
| survey | Tasman Fracture - NESP multi-survey compilation | various | Tasman Fracture | 4-10m |  | various |  |
| survey | Tasman Fracture 2004 3m |  | Tasman Fracture | 3m |  | UTAS |  |
| survey | Tasman Sea Bathymetry 16m - 64m (CSIRO) ss200611 | SS11/2006 | Huon, Tasman Fracture | 16-64m | Multibeam | CMAR/DEH | https://marlin.csiro.au/geonetwork/srv/eng/catalog.search#/metadata/bc1b3741-e6dc-5039-e044-00144f7bc0f4 |
| survey | Tasman Sea Margin Bathymetry 10m - 210m (CSIRO) in2022_v05 | in2022_v05 | Flinders, Freycinet, Central Eastern, Hunter, Jervis | 10-128m | Multibeam | USYD | https://marlin.csiro.au/geonetwork/srv/eng/catalog.search#/metadata/c1b8fcf4-3a06-45b7-aefb-d36df0a904bc |
| survey | Tasmantid Seamounts Bathymetry 32m - 64m (CSIRO) ss2012_v07 | SS2012_V07 | Central Eastern, Coral Sea | 32-64m | Multibeam | University of Queensland | https://marlin.csiro.au/geonetwork/srv/eng/catalog.search#/metadata/fefe9e4a-f3af-0d86-e043-08114f8cc59d |
| survey | Two Rocks | TR2009TRBS_Lidar | Two Rocks | 10m | Lidar | WA Department of Transport | https://dot-wa.maps.arcgis.com/home/item.html?id=3b3ddc34aabd4c1c8765fbe876afd71f |
| survey | Two Rocks | TR20141022_Multi | Two Rocks | 1m | Multibeam | WA Department of Transport | https://dot-wa.maps.arcgis.com/home/item.html?id=3b3ddc34aabd4c1c8765fbe876afd71f |
| survey | Vanderford Glacier Bathymetry 2021-22 5-128m (AAD) | 20210002S | Huon | 64m | Multibeam | Australian Antarctic Division (AAD) | https://pid.geoscience.gov.au/dataset/ga/147241 |
| survey | Visioning the Coral Sea Bathymetry 2020 16m - 64m | FK200429 | Coral Sea | 16m | Multibeam | JCU | https://pid.geoscience.gov.au/dataset/ga/140048 |
| compilation | WA Margins | various | Abrolhos | 90m |  | GA | https://pid.geoscience.gov.au/dataset/ga/73313 |
| survey | WA Marine Futures | various | Bremer, Eastern Recherche, Geographe, South-west Corner | 2.5m |  | UWA | https://metadata.imas.utas.edu.au/geonetwork/srv/eng/catalog.search#/metadata/532138db-7c8f-4346-82cf-04d16e4d662d |
| survey | West Tasmanian Bathymetry 10m - 210m (CSIRO) in2023_v02 | in2023_v02 | Huon, Tasman Fracture | 15-128m | Multibeam | CSIRO | https://marlin.csiro.au/geonetwork/srv/eng/catalog.search#/metadata/f4200511-9e09-46c2-ba54-7b8fef6306ae |
| survey | Western approaches to Torres Strait QLD (HIPP SI 1004) Bathymetry 2020 30m | SI 1004 | West Cape York | 30m | Multibeam | Australian Hydrographic Office (AHO) | https://pid.geoscience.gov.au/dataset/ga/147825 |
| survey | Western Australian Margins Bathymetry 2008-09 100m | GA-2476 | Abrolhos, Carnarvon Canyon, Christmas Island, Gascoyne, Montebello, Two Rocks | 100m | Multibeam | GA | https://pid.geoscience.gov.au/dataset/ga/72719 |
| survey | William's Ridge, Kerguelen (IN2020_V01) | IN2020_V01 | Perth Canyon, South-west Corner | 150m | Multibeam | UTAS | https://marlin.csiro.au/geonetwork/srv/eng/catalog.search#/metadata/7c0eb3ae-c987-46e8-9930-5986d5dd8df2 |
| compilation | XYZ multibeam bathymetric grids of the Macquarie Ridge | various | Macquarie Island | 100m |  | GA | https://pid.geoscience.gov.au/dataset/ga/73697 |
| survey | Zeehan Franklin BF2022_v01 - 2m | BF2022_V01 | Franklin, Zeehan | 2m |  | UTAS |  |
